# Supplementary material
Source: PubMed Central journal article supplement (PMC7099187)
Supplement: jcsm.15.12.1799.SD1.pdf [file jcsm.15.12.1799.SD1.pdf]

**Table S1. Key Findings from Multivariable FSS and TST Change Models**

| PRO Model   | Primary Model                          | Individual Parameter   | Univariable Effect (95% CI) | Univariable p-value | Multivariable Effect (95% CI) | Multivariable p-value |
|-------------|----------------------------------------|------------------------|-----------------------------|---------------------|-------------------------------|-----------------------|
| FSS<br>N=89 | Disease Type<br>(2 levels)             | Narcolepsy             | -3.29(-8.59,2.02)           | 0.22                | -2.71(-8.63,3.20)             | 0.36                  |
|             |                                        | FSS: Baseline          | -0.45(-0.63,-0.27)          | <b>&lt;0.001</b>    | -0.43(-0.62,-0.24)            | <b>&lt;0.001</b>      |
|             |                                        | STD: Baseline          | 0.18(-1.31,1.67)            | 0.81                | 0.53(-1.23,2.28)              | 0.55                  |
|             | SO Use                                 | SO Use                 | -4.57(-10.04,0.90)          | 0.10                | -2.98(-8.61,2.65)             | 0.30                  |
|             |                                        | FSS: Baseline          | -0.45(-0.63,-0.27)          | <b>&lt;0.001</b>    | -0.42(-0.61,-0.23)            | <b>&lt;0.001</b>      |
|             |                                        | STD: Baseline          | 0.18(-1.31,1.67)            | 0.81                | 0.52(-1.20,2.24)              | 0.55                  |
|             | Follow-up<br>Pharmacotherapy<br>Number | Follow-up: Polytherapy | -2.38(-7.76,3.00)           | 0.38                | 0.47(-5.25,6.19)              | 0.87                  |
|             |                                        | FSS: Baseline          | -0.45(-0.63,-0.27)          | <b>&lt;0.001</b>    | -0.44(-0.63,-0.24)            | <b>&lt;0.001</b>      |
|             |                                        | STD: Baseline          | 0.18(-1.31,1.67)            | 0.81                | 0.62(-1.18,2.42)              | 0.49                  |
|             | Follow-up STD                          | STD: Difference        | 0.48(-1.04,2.01)            | 0.53                | 1.06(-0.55,2.67)              | 0.19                  |
|             |                                        | FSS: Baseline          | -0.45(-0.63,-0.27)          | <b>&lt;0.001</b>    | -0.45(-0.64,-0.27)            | <b>&lt;0.001</b>      |
|             |                                        | STD: Baseline          | 0.18(-1.31,1.67)            | 0.81                | 0.59(-1.00,2.18)              | 0.46                  |
| TST<br>N=91 | Disease Type<br>(2 levels)             | Narcolepsy             | 0.05(-0.76,0.86)            | 0.91                | 0.16(-0.42,0.74)              | 0.59                  |
|             |                                        | TST: Baseline          | -0.69(-0.79,-0.59)          | <b>&lt;0.001</b>    | -0.70(-0.80,-0.59)            | <b>&lt;0.001</b>      |
|             |                                        | STD: Baseline          | -0.04(-0.27,0.19)           | 0.73                | 0.05(-0.12,0.23)              | 0.56                  |
|             | SO Use                                 | SO Use                 | -0.74(-1.57,0.10)           | 0.083               | -0.32(-0.87,0.24)             | 0.26                  |
|             |                                        | TST: Baseline          | -0.69(-0.79,-0.59)          | <b>&lt;0.001</b>    | -0.69(-0.80,-0.58)            | <b>&lt;0.001</b>      |
|             |                                        | STD: Baseline          | -0.04(-0.27,0.19)           | 0.73                | 0.10(-0.07,0.27)              | 0.25                  |
|             | Follow-up<br>Pharmacotherapy<br>Number | Follow-up: Polytherapy | -0.18(-1.01,0.64)           | 0.66                | -0.17(-0.73,0.38)             | 0.54                  |
|             |                                        | TST: Baseline          | -0.69(-0.79,-0.59)          | <b>&lt;0.001</b>    | -0.69(-0.79,-0.58)            | <b>&lt;0.001</b>      |
|             |                                        | STD: Baseline          | -0.04(-0.27,0.19)           | 0.73                | 0.05(-0.13,0.23)              | 0.58                  |
|             | Follow-up STD                          | STD: Difference        | 0.08(-0.15,0.32)            | 0.49                | -0.04(-0.20,0.12)             | 0.63                  |
|             |                                        | TST: Baseline          | -0.69(-0.79,-0.59)          | <b>&lt;0.001</b>    | -0.69(-0.80,-0.58)            | <b>&lt;0.001</b>      |
|             |                                        | STD: Baseline          | -0.04(-0.27,0.19)           | 0.73                | 0.05(-0.11,0.21)              | 0.53                  |

CI: Confidence Interval
